# Supplementary material for: Zwitterionic niobium and tantalum complexes with bidentate aminophenol scaffolds: synthesis, structural characterization and use in the ring opening polymerization of lactides
Source: Royal Society of Chemistry journal article supplement (doi:10.1039/c6ra09789h), 2016-01-01
Supplement: c6ra09789h1.pdf [file c6ra09789h1.pdf]

## **Supporting Information**

# Zwitterionic niobium and tantalum complexes with bidentate aminophenol scaffolds: Synthesis, structural characterization and use in the ring opening polymerization of lactides

Sagnik K. Roymuhury,<sup>a</sup> Debashis Chakraborty,<sup>\*b</sup> and Venkatachalam Ramkumar<sup>b</sup>

<sup>a</sup>Department of Chemistry, Indian Institute of Technology Patna, Patna-800 013, Bihar, India

<sup>b</sup>Department of Chemistry, Indian Institute of Technology Madras, Chennai-600 036, Tamil  
Nadu, India

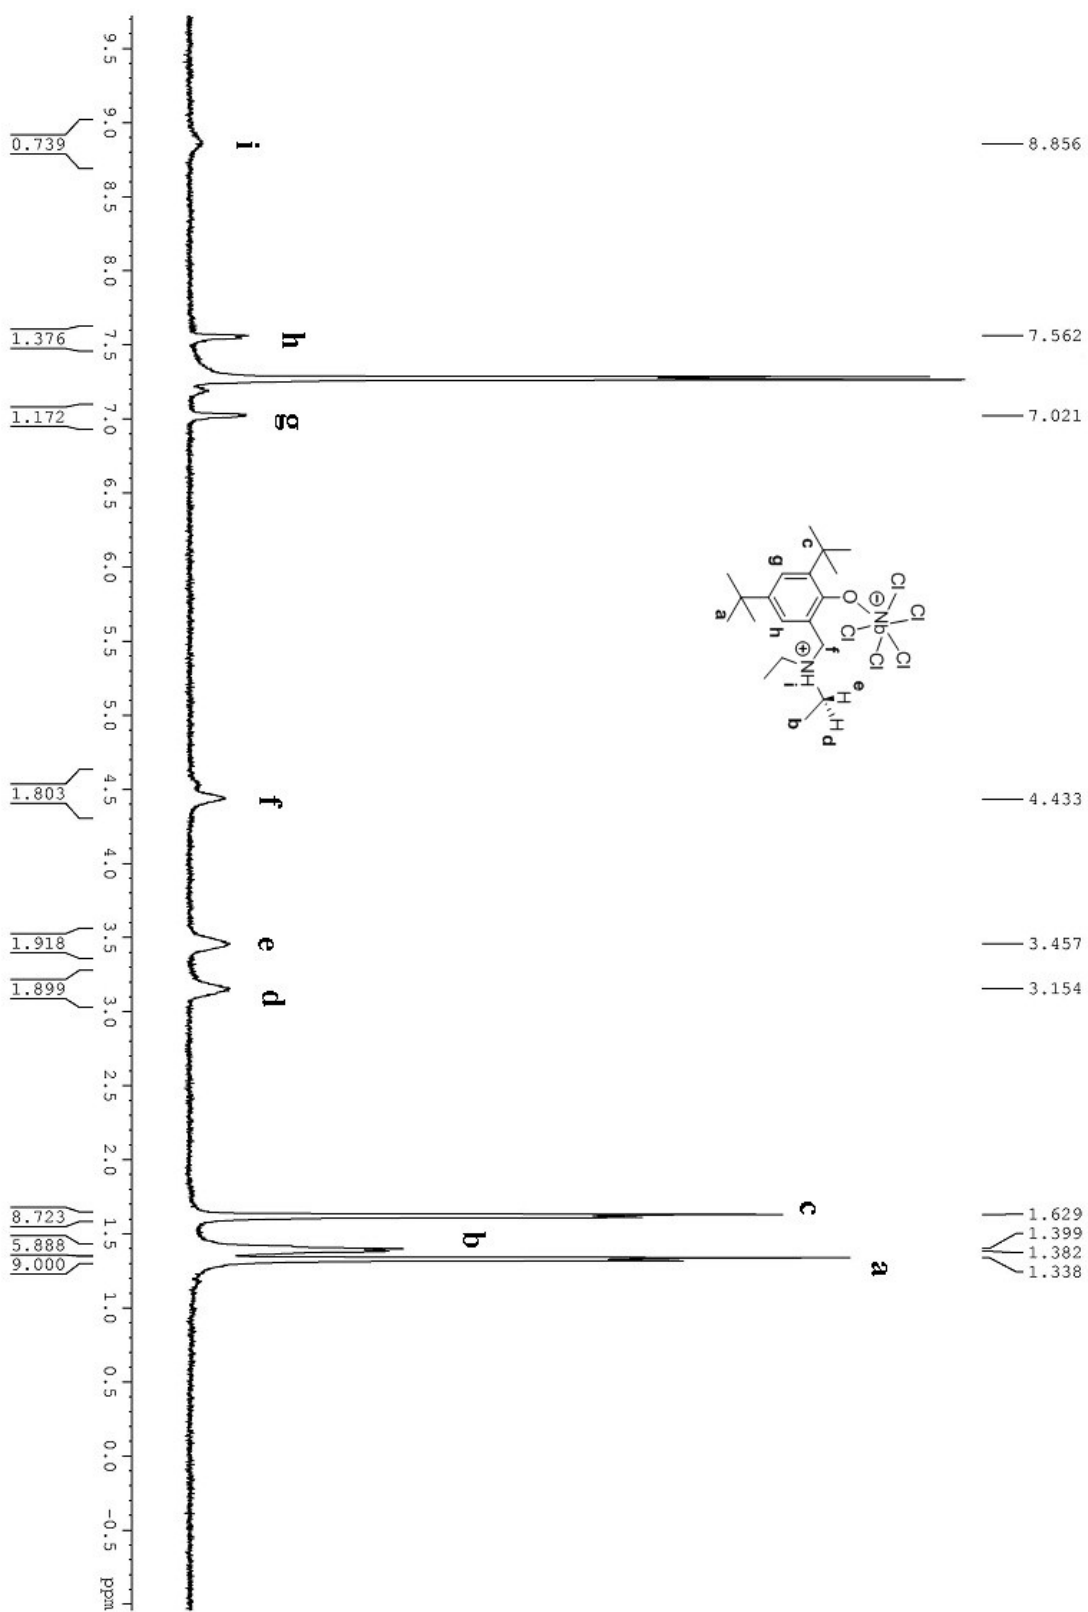

Fig. S1.  $^1\text{H}$  NMR (400 MHz,  $\text{CDCl}_3$ ) of Compound 1

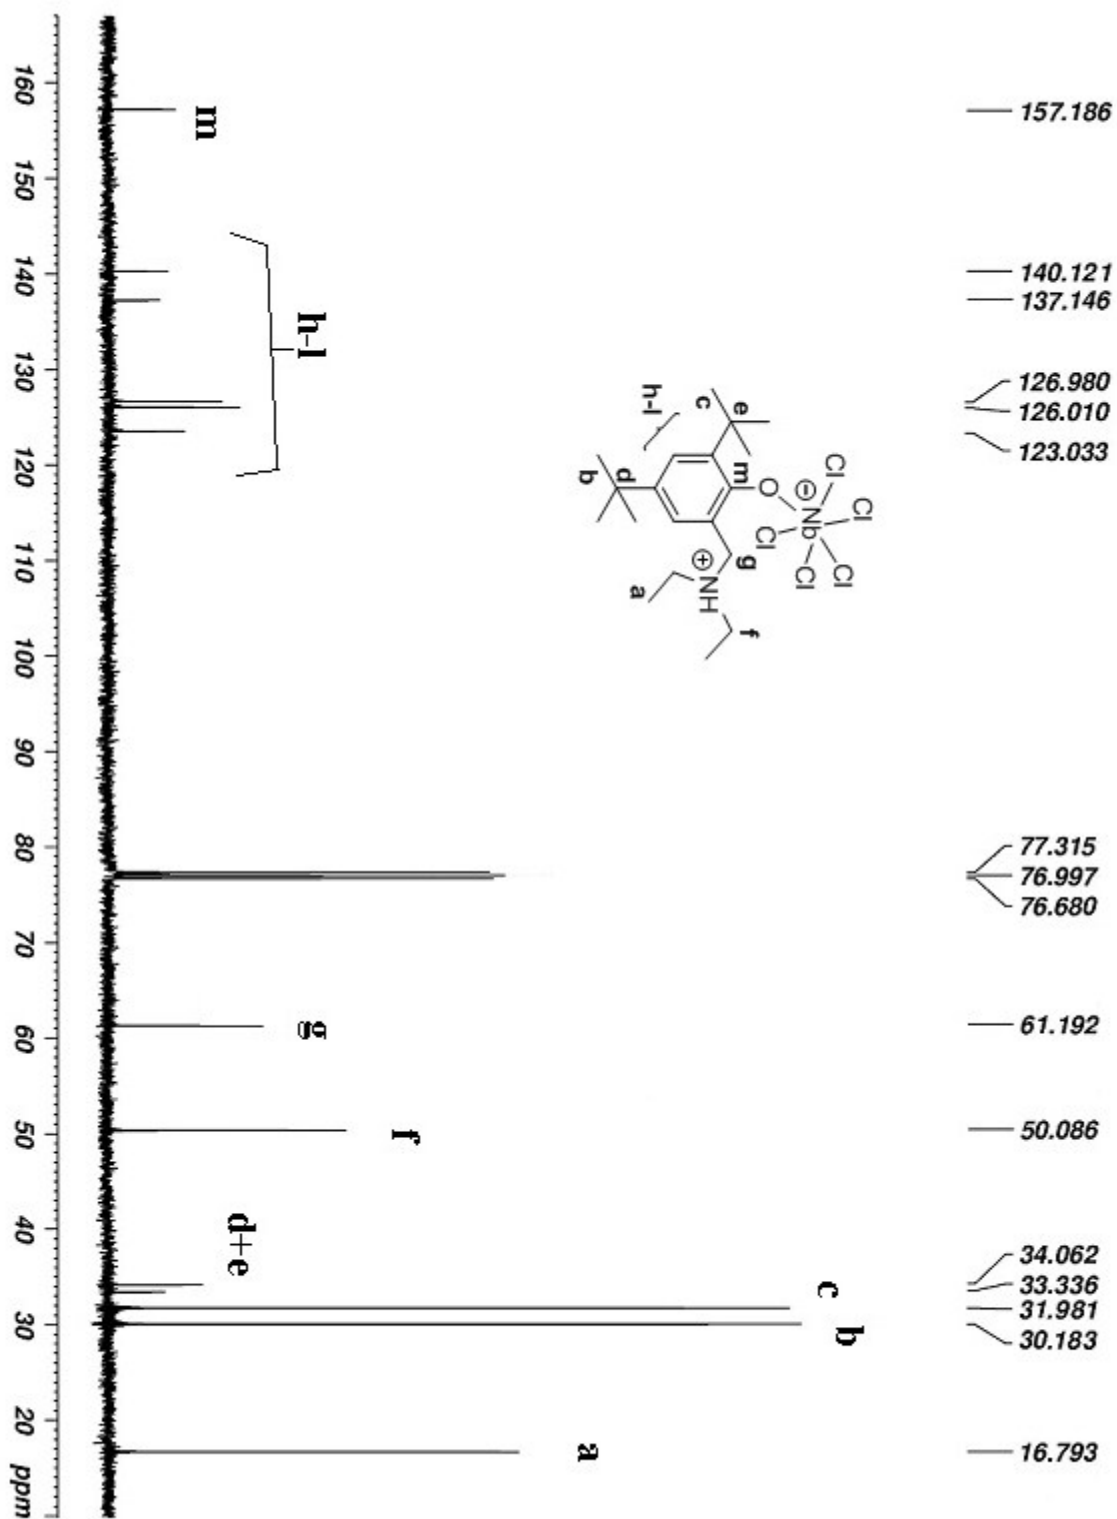

Fig. S2.  $^{13}\text{C}$  NMR (100 MHz,  $\text{CDCl}_3$ ) of Compound 1

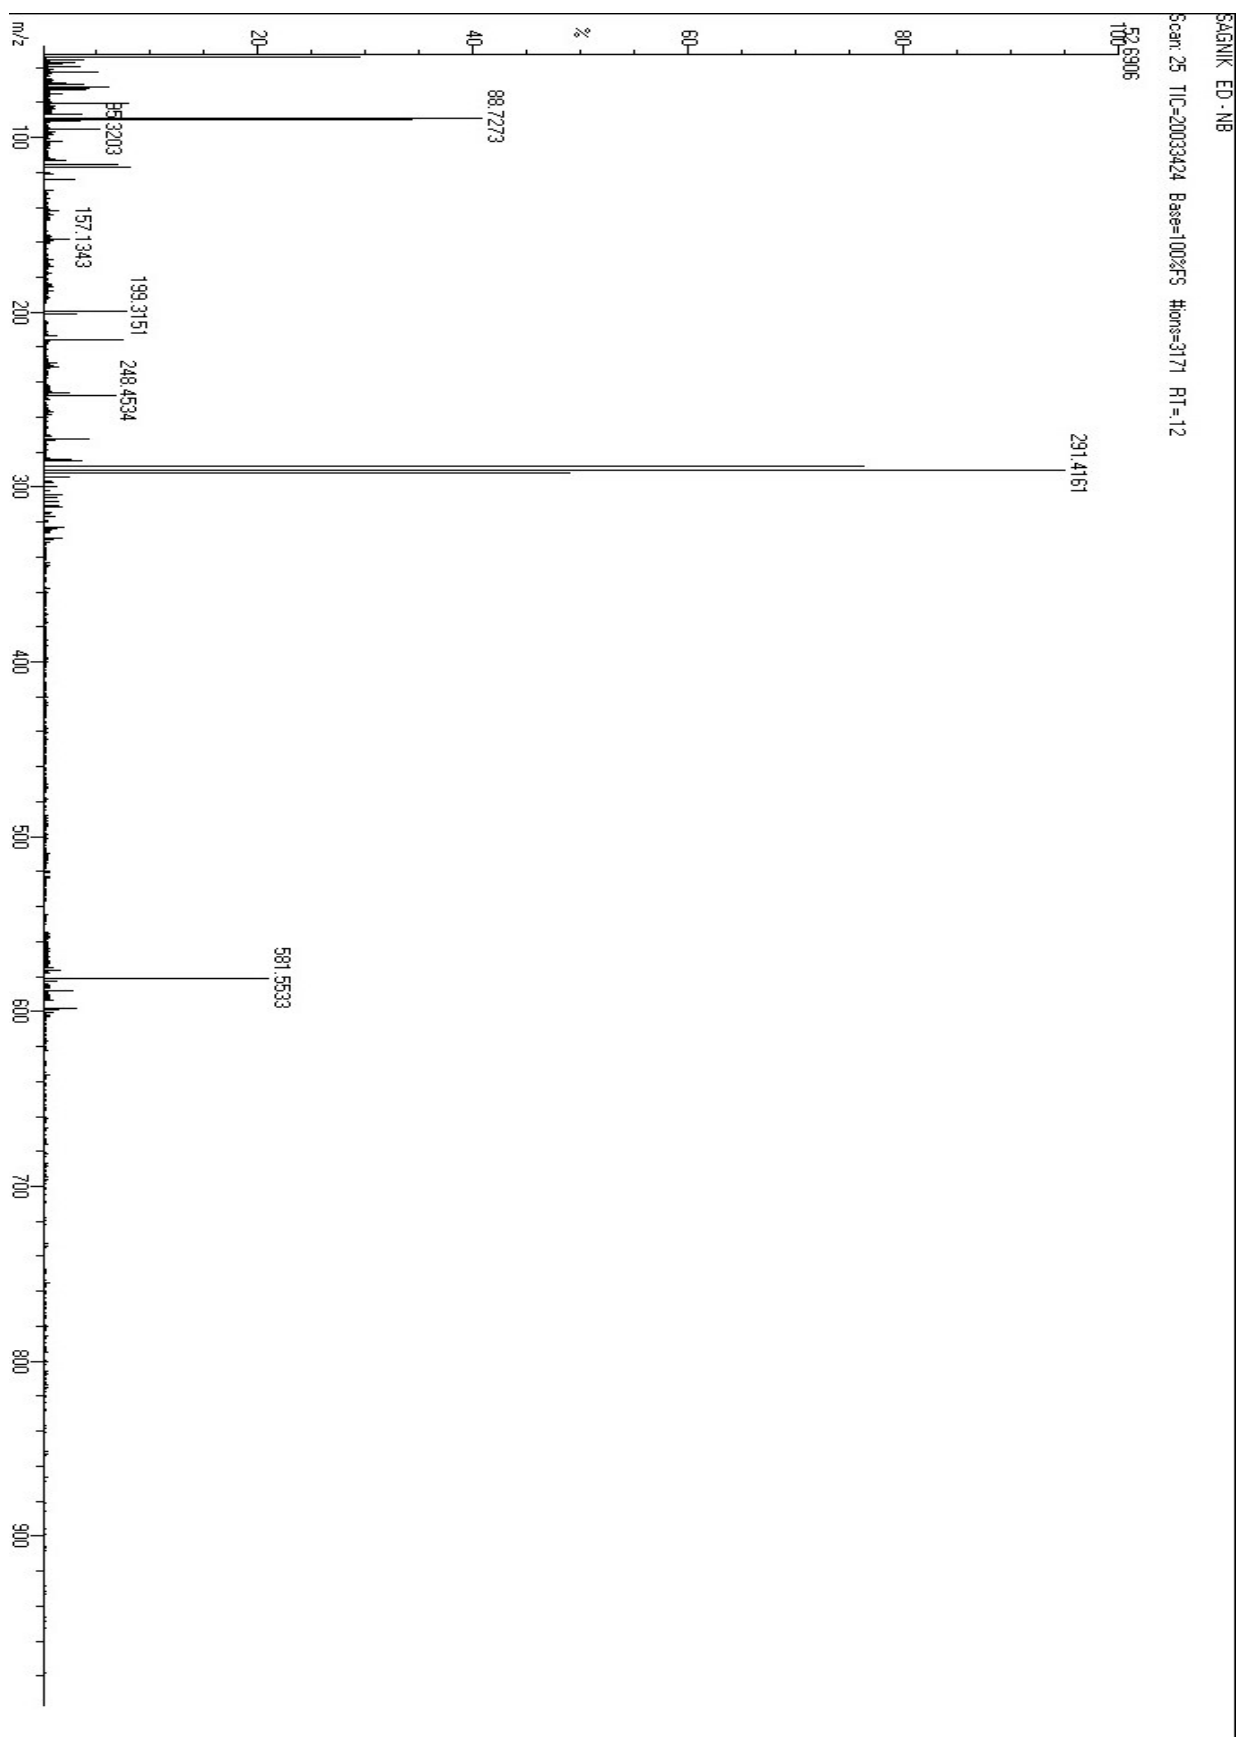

**Fig. S3.** ESI mass spectrum of Compound 1

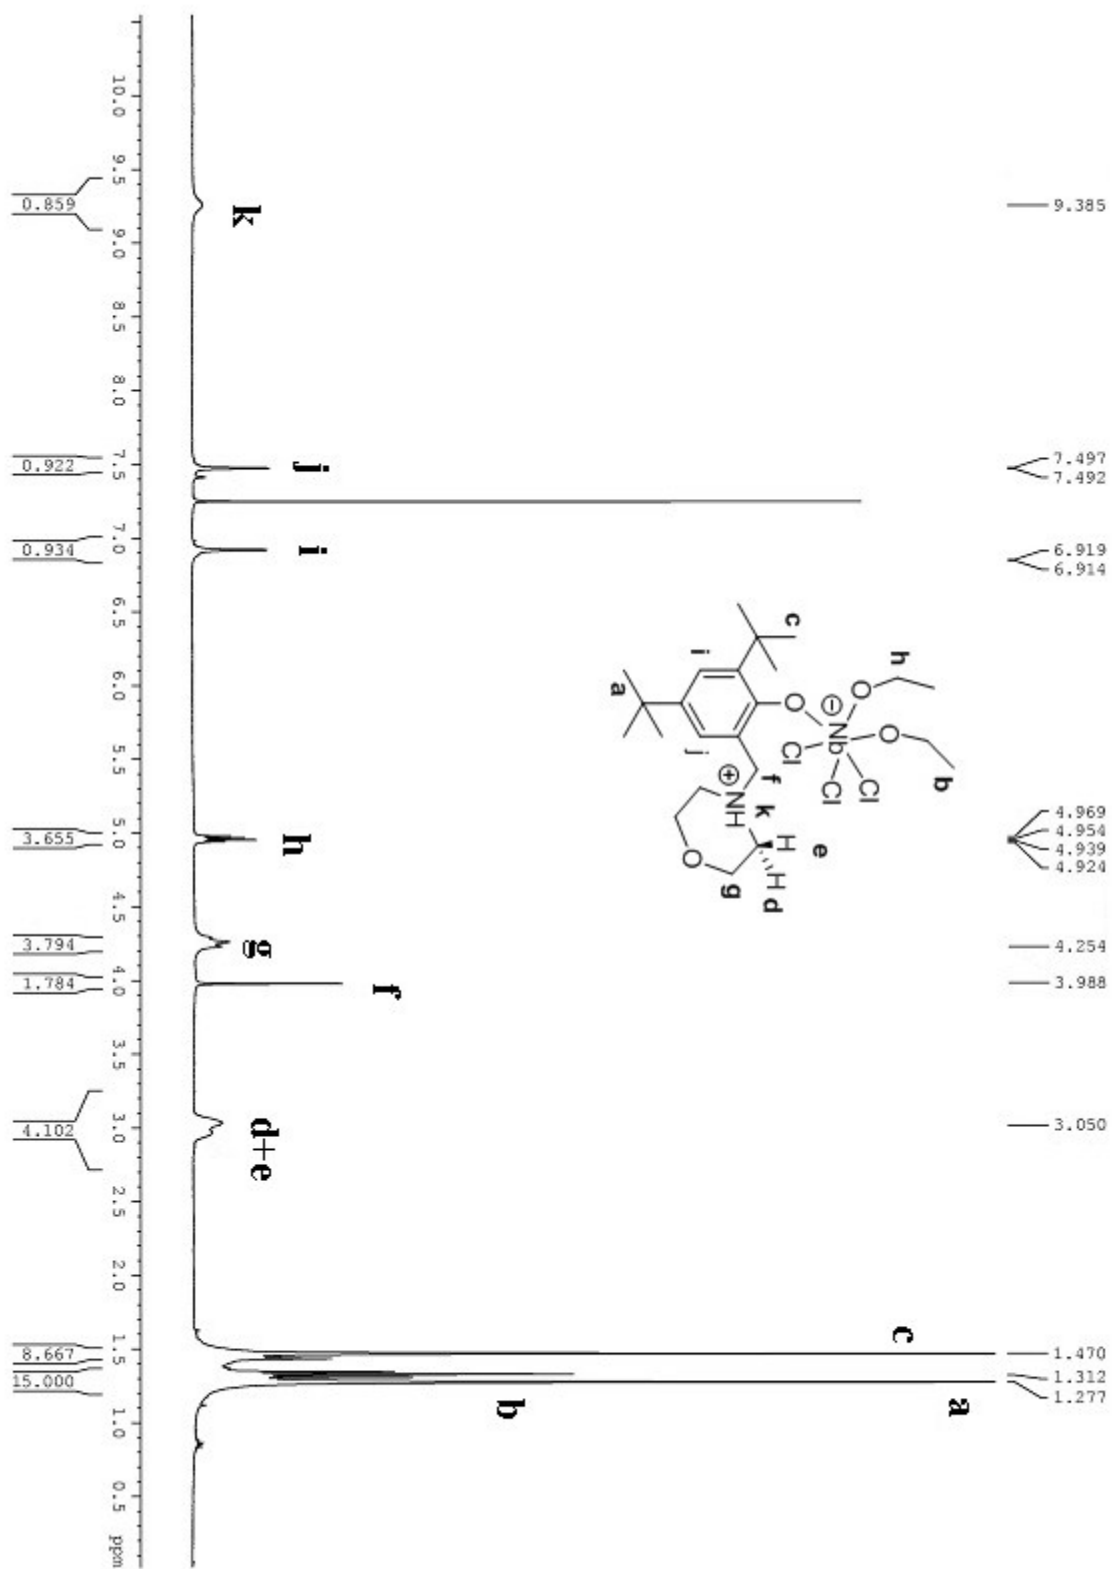

Fig. S4. <sup>1</sup>H NMR (400 MHz, CDCl<sub>3</sub>) of Compound 2a

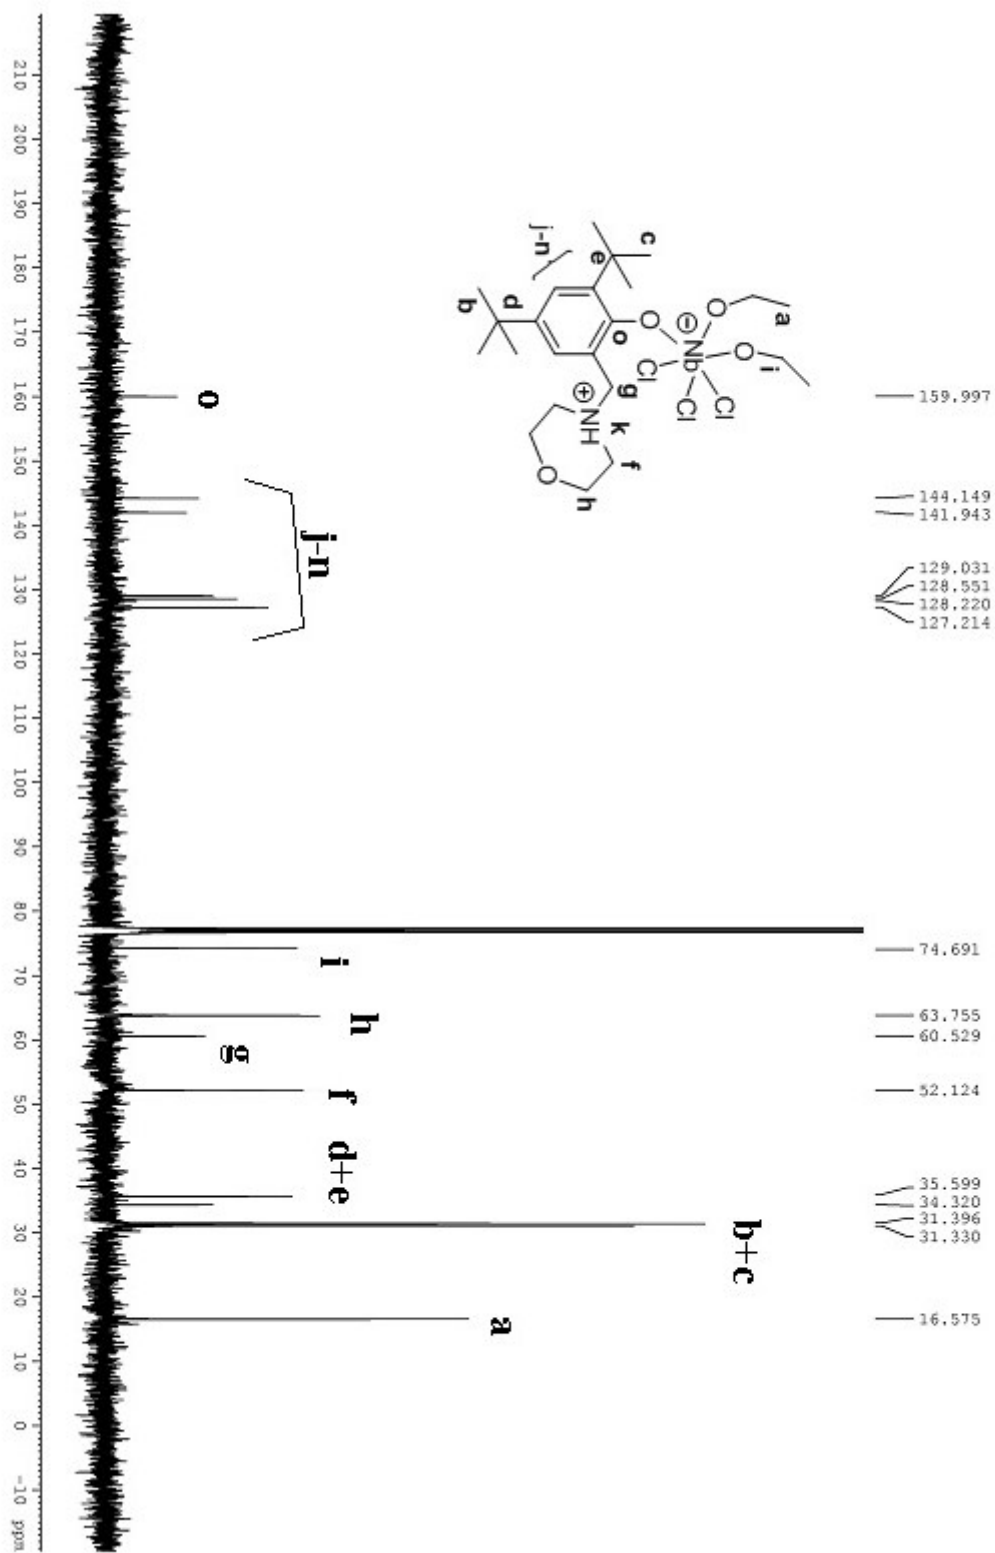

Fig. S5. <sup>13</sup>C NMR (100 MHz, CDCl<sub>3</sub>) of Compound 2a

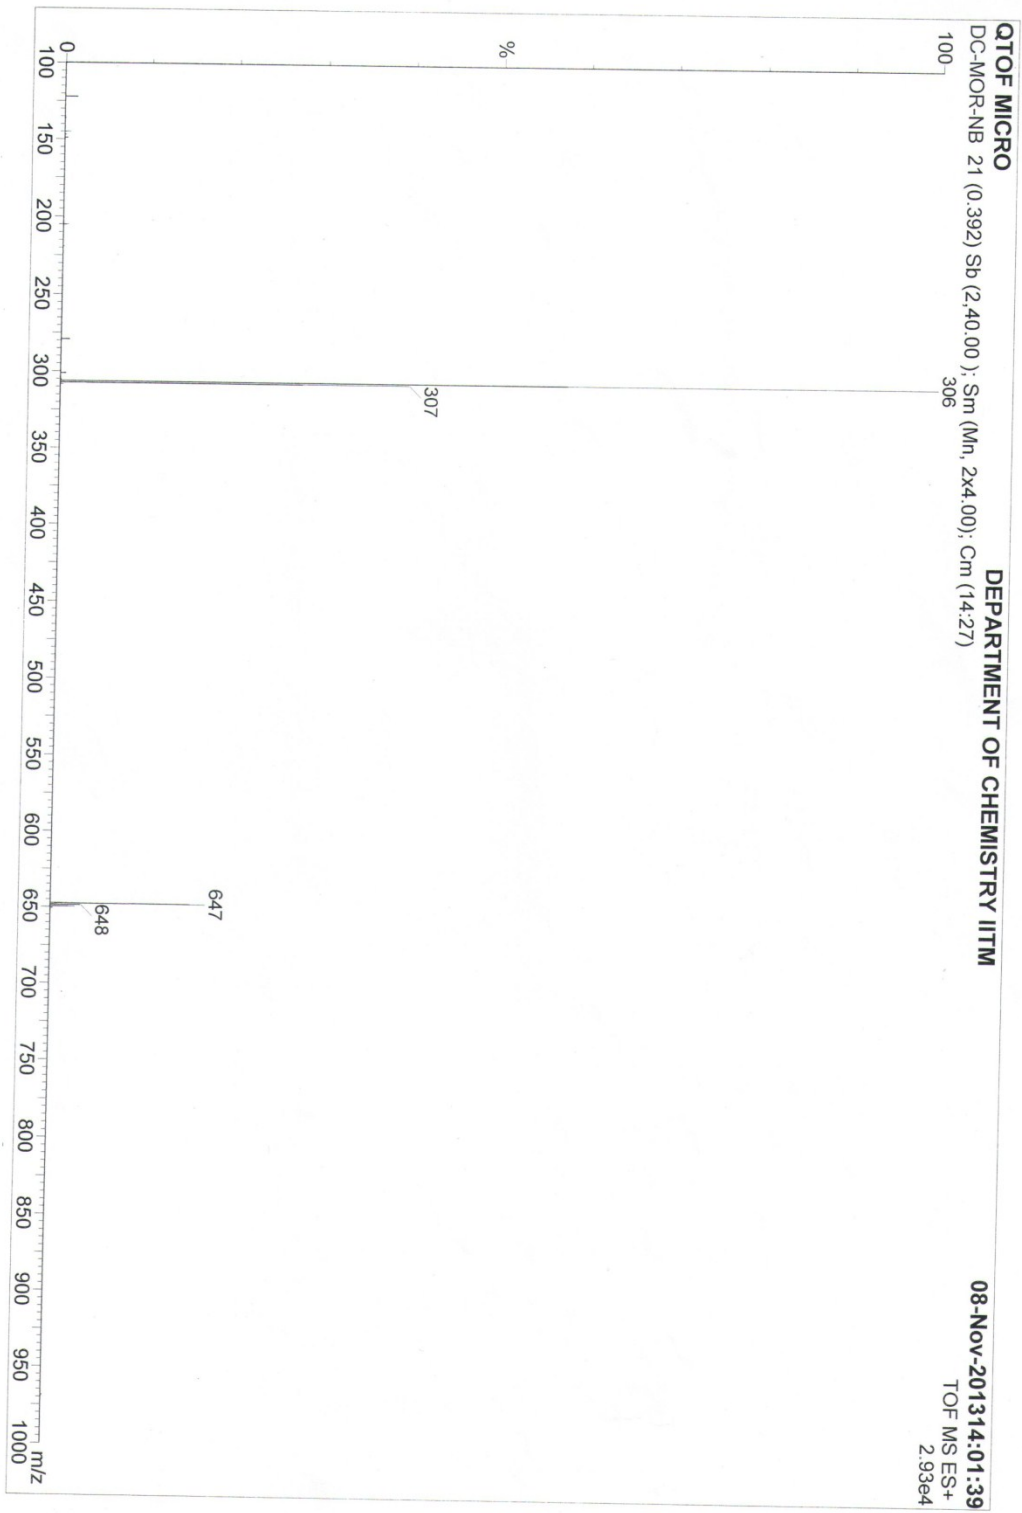

Fig. S6. ESI mass spectrum of Compound 2

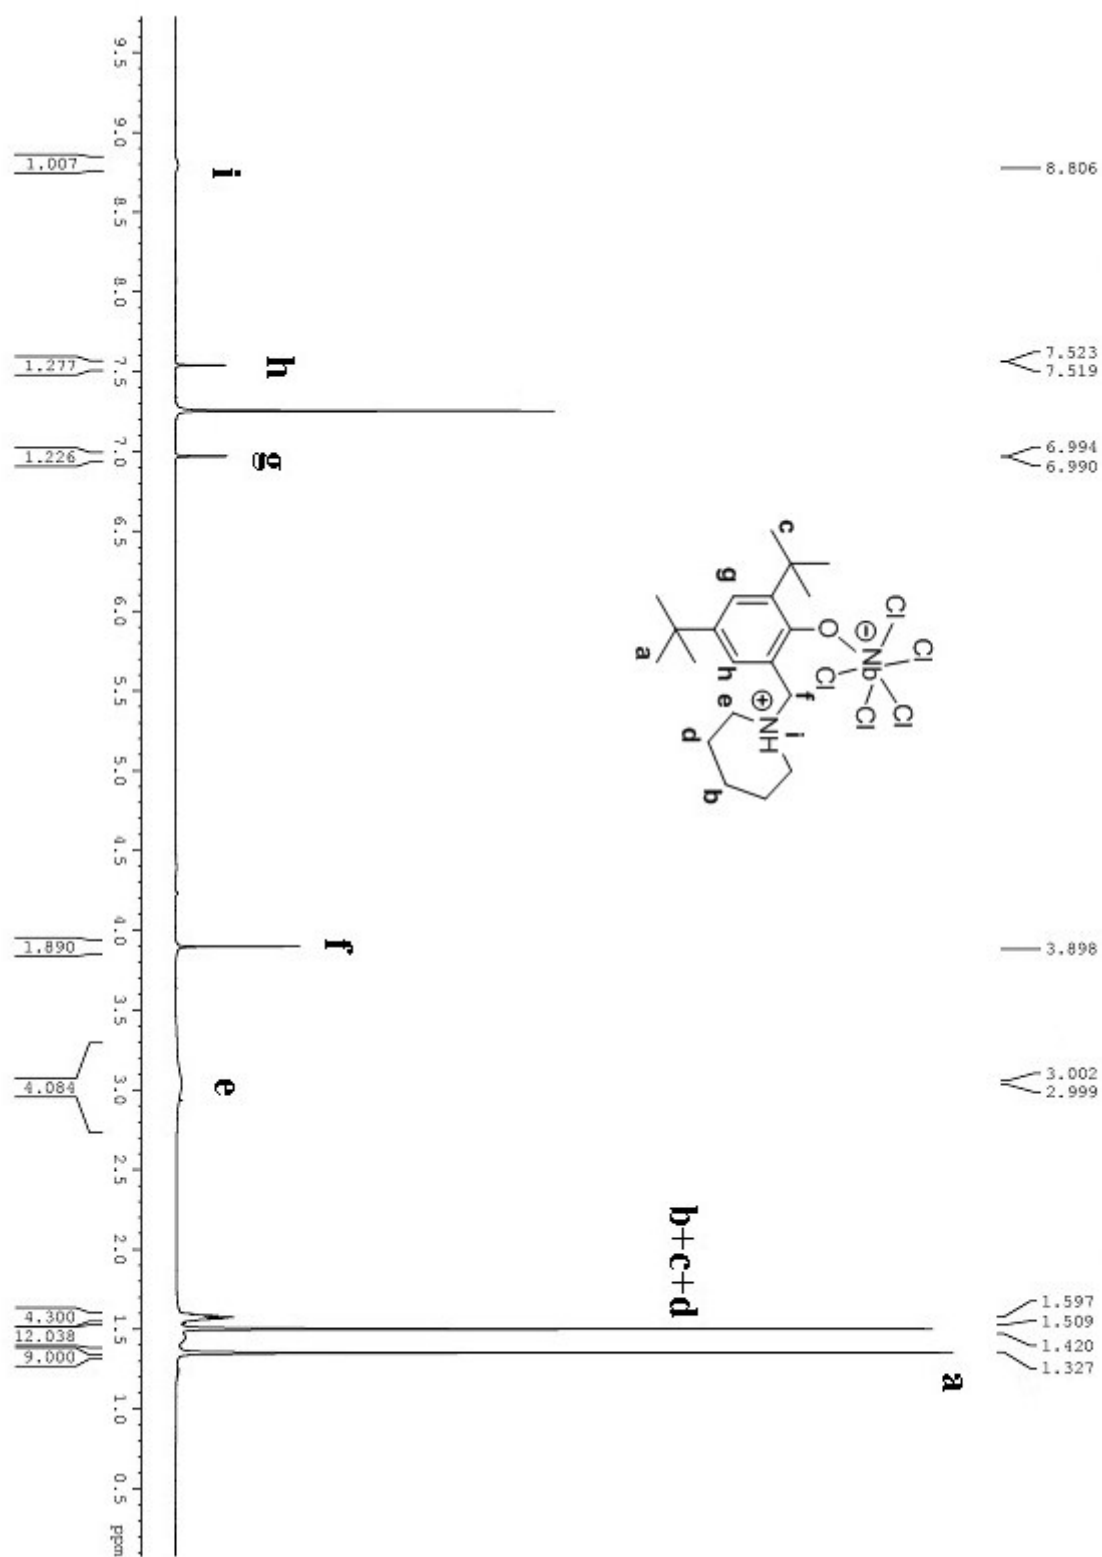

Fig. S7.  $^1\text{H}$  NMR (400 MHz,  $\text{CDCl}_3$ ) of Compound 3



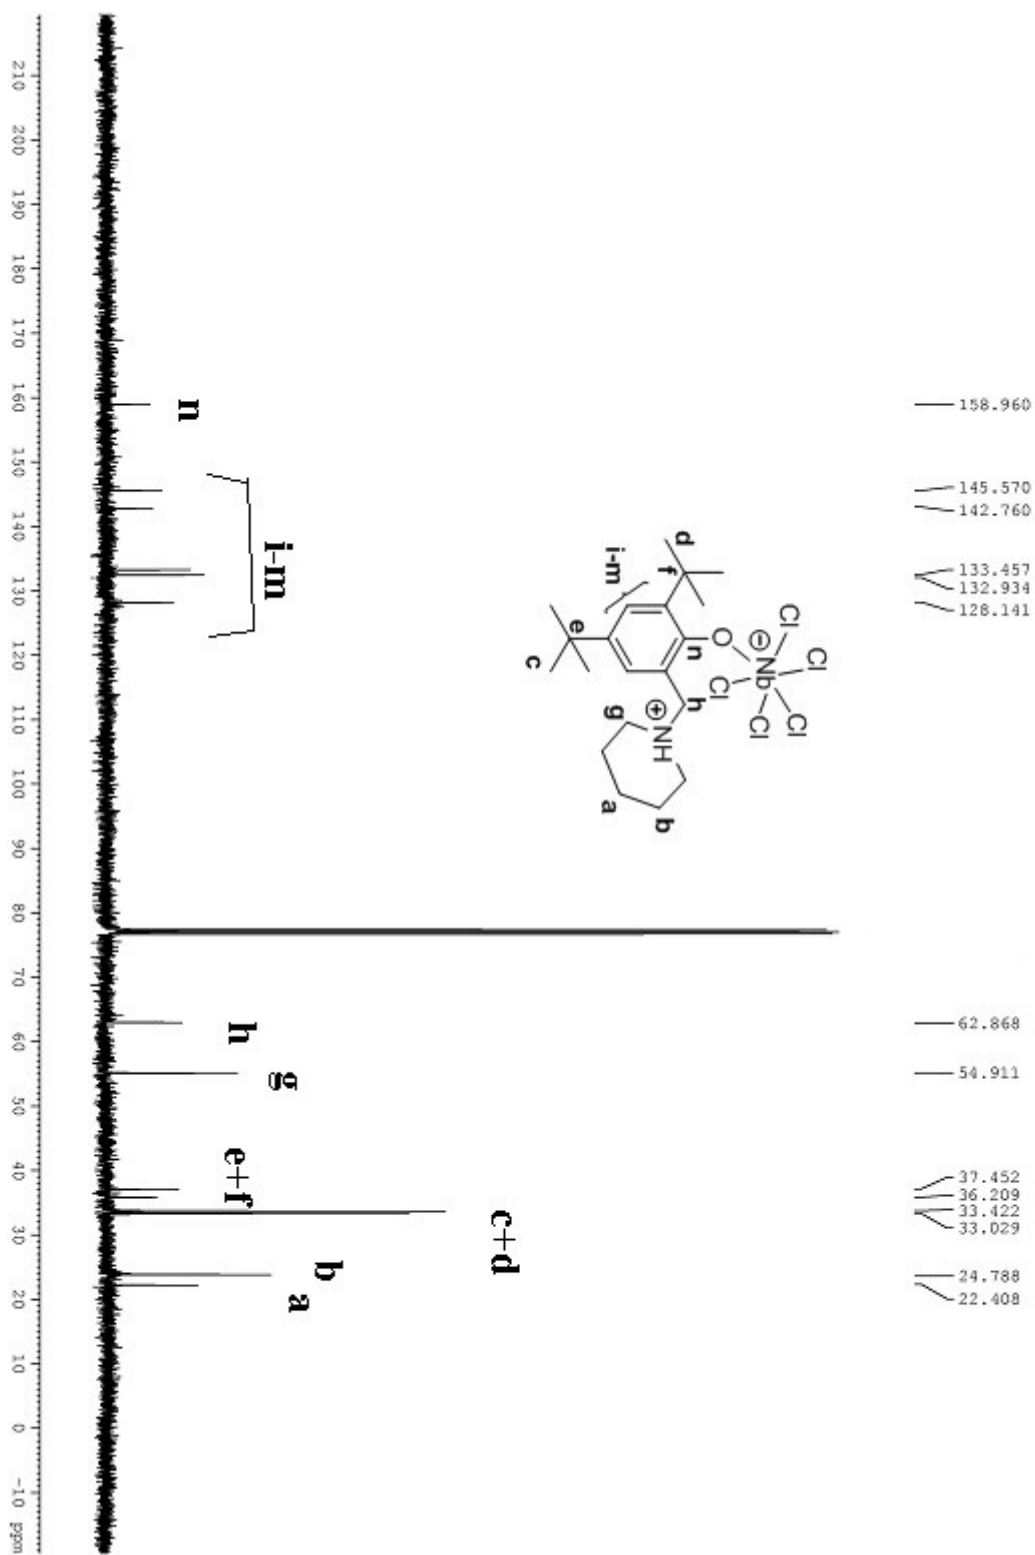

Fig. S8.  $^{13}\text{C}$  NMR (100 MHz,  $\text{CDCl}_3$ ) of Compound 3

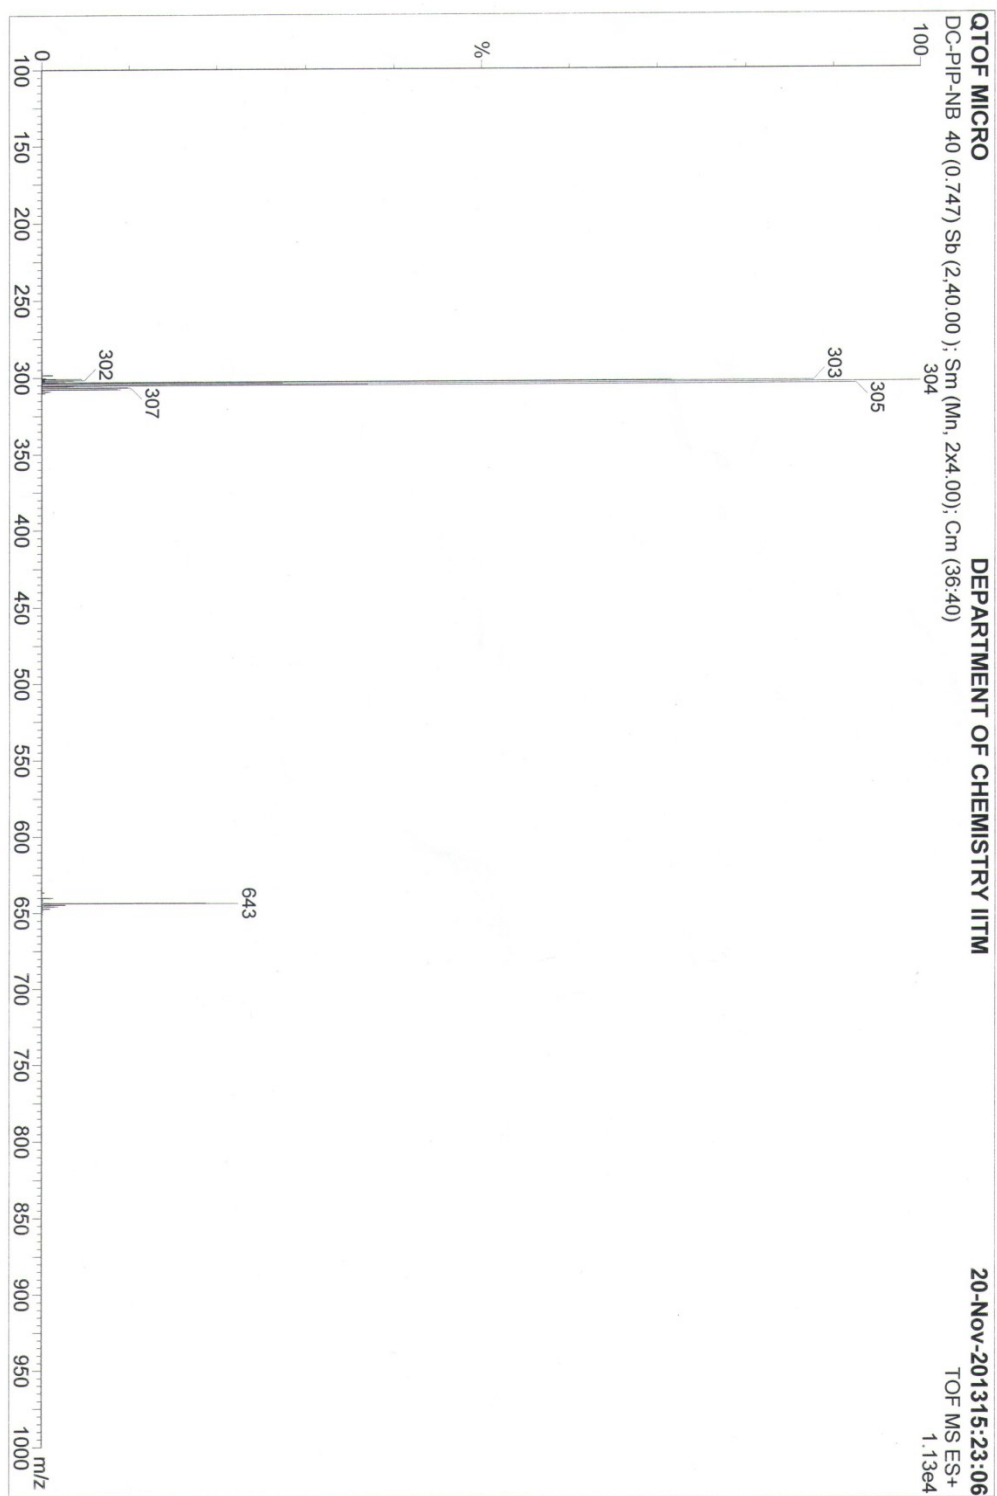

**Fig. S9.** ESI mass spectrum of Compound 3

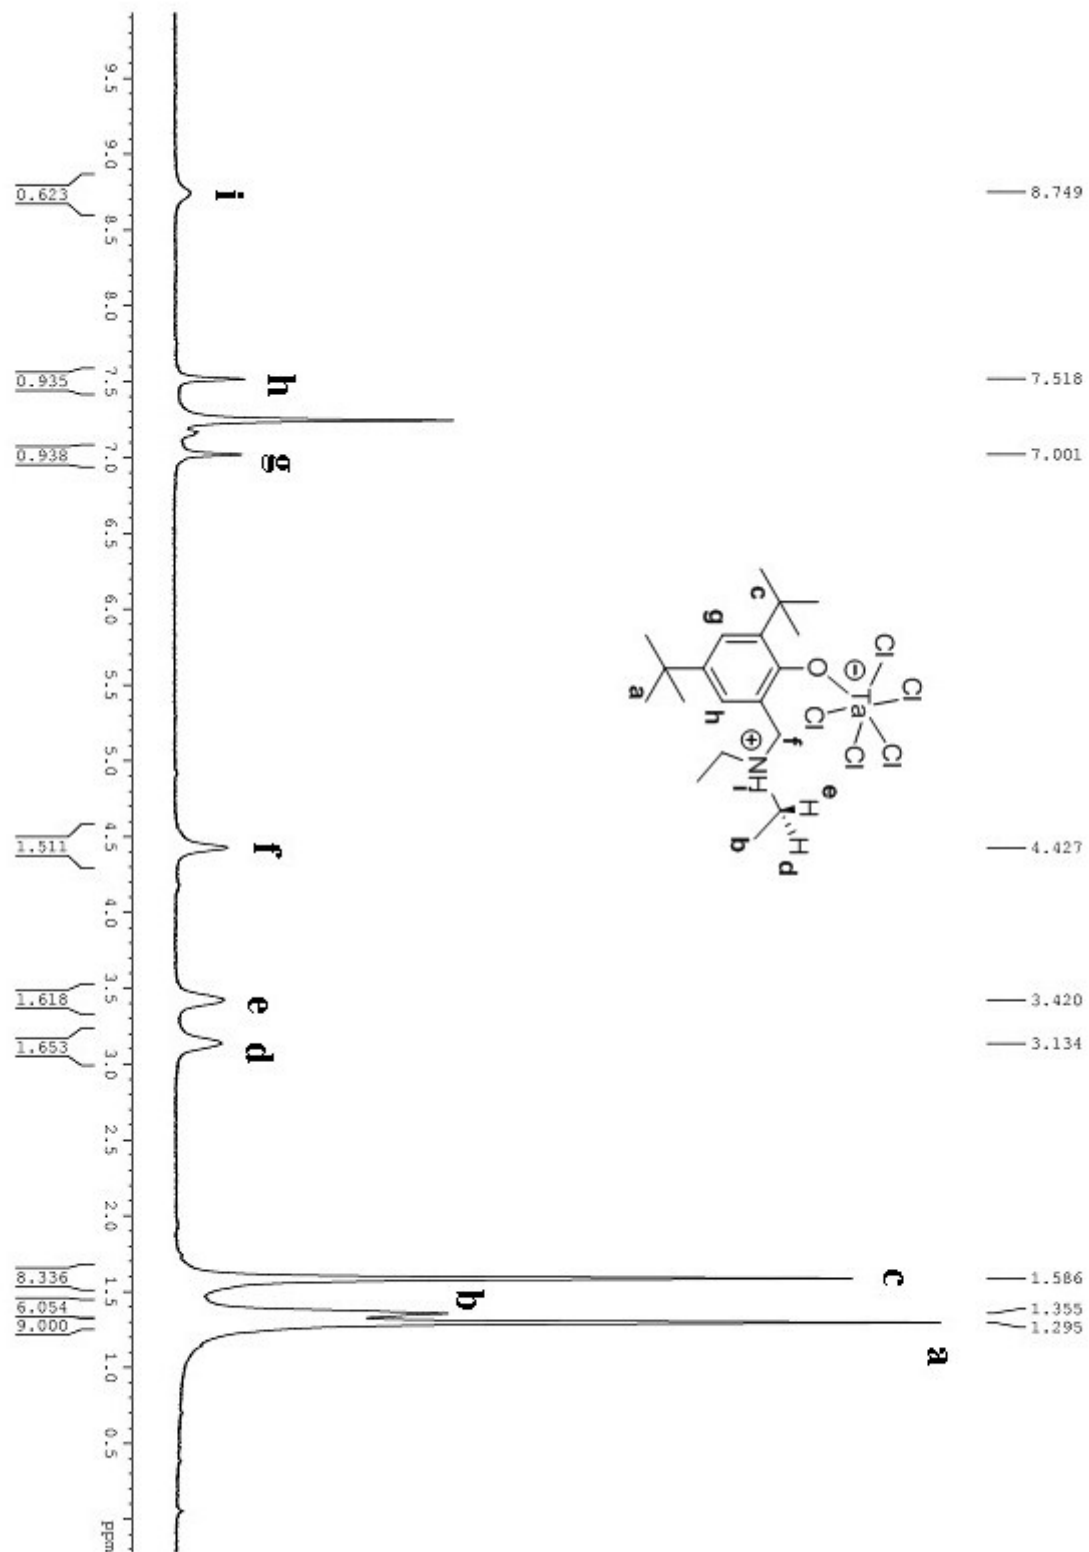

**Fig. S10.**  $^1\text{H}$  NMR (400 MHz,  $\text{CDCl}_3$ ) of Compound 4

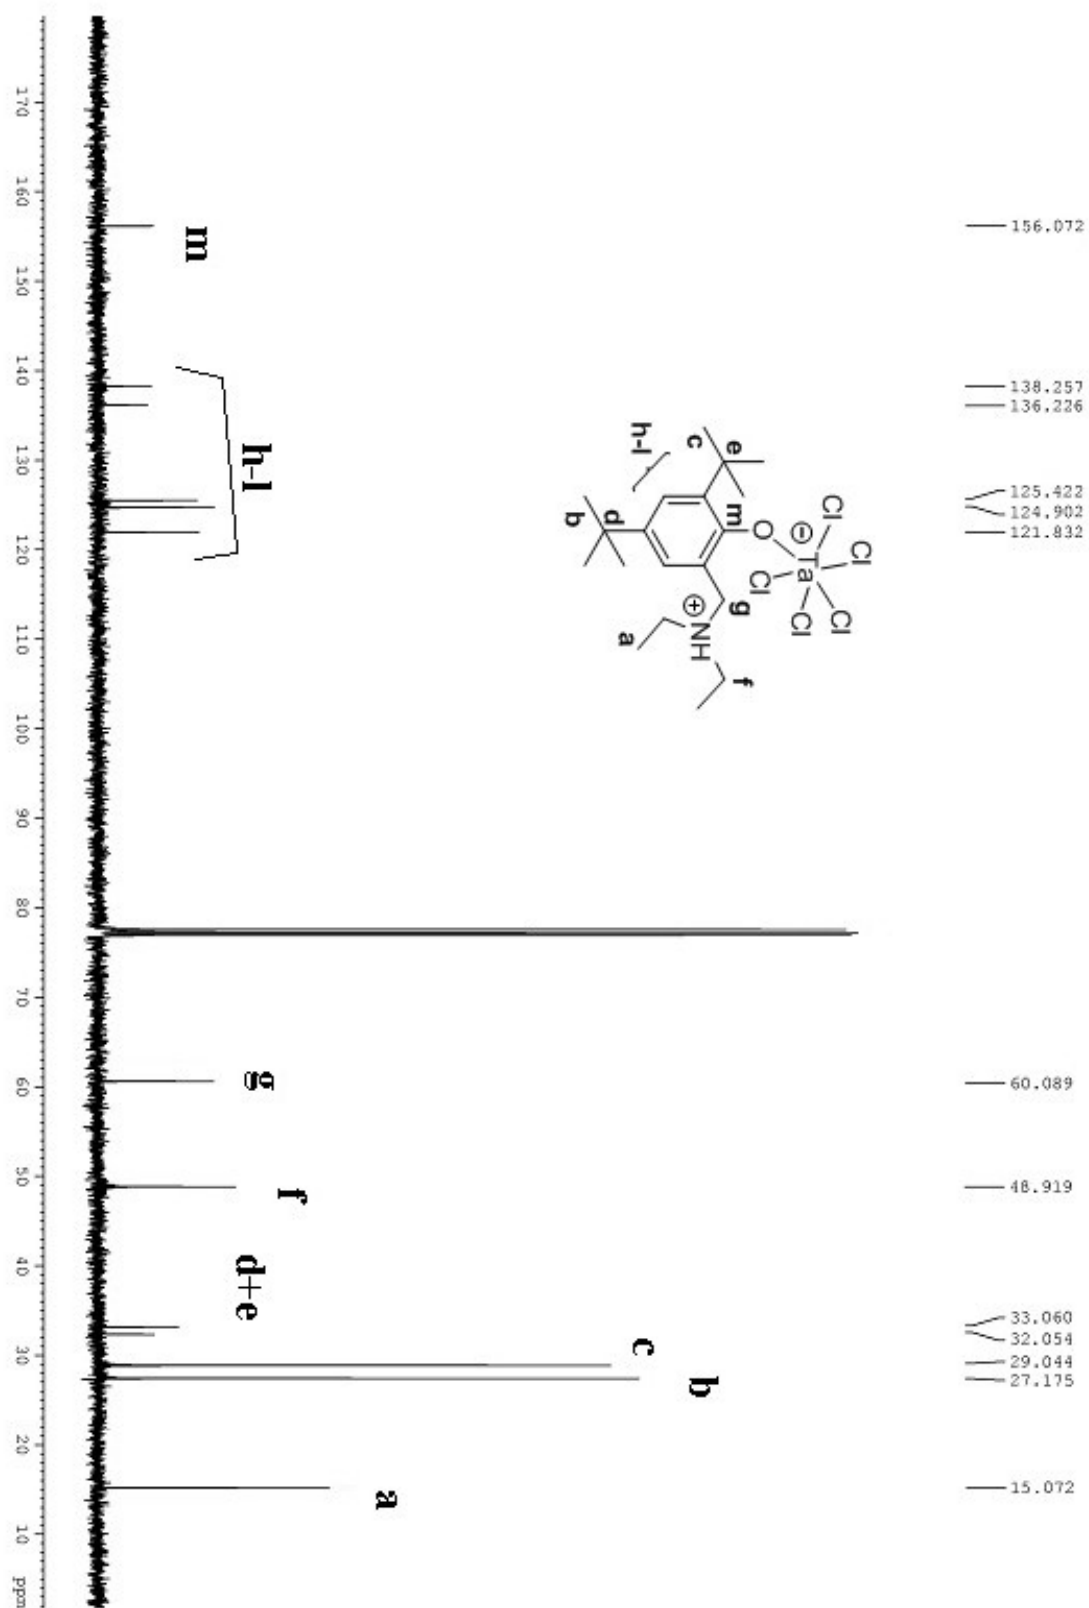

Fig. S11. <sup>13</sup>C NMR (100 MHz, CDCl<sub>3</sub>) of Compound 4

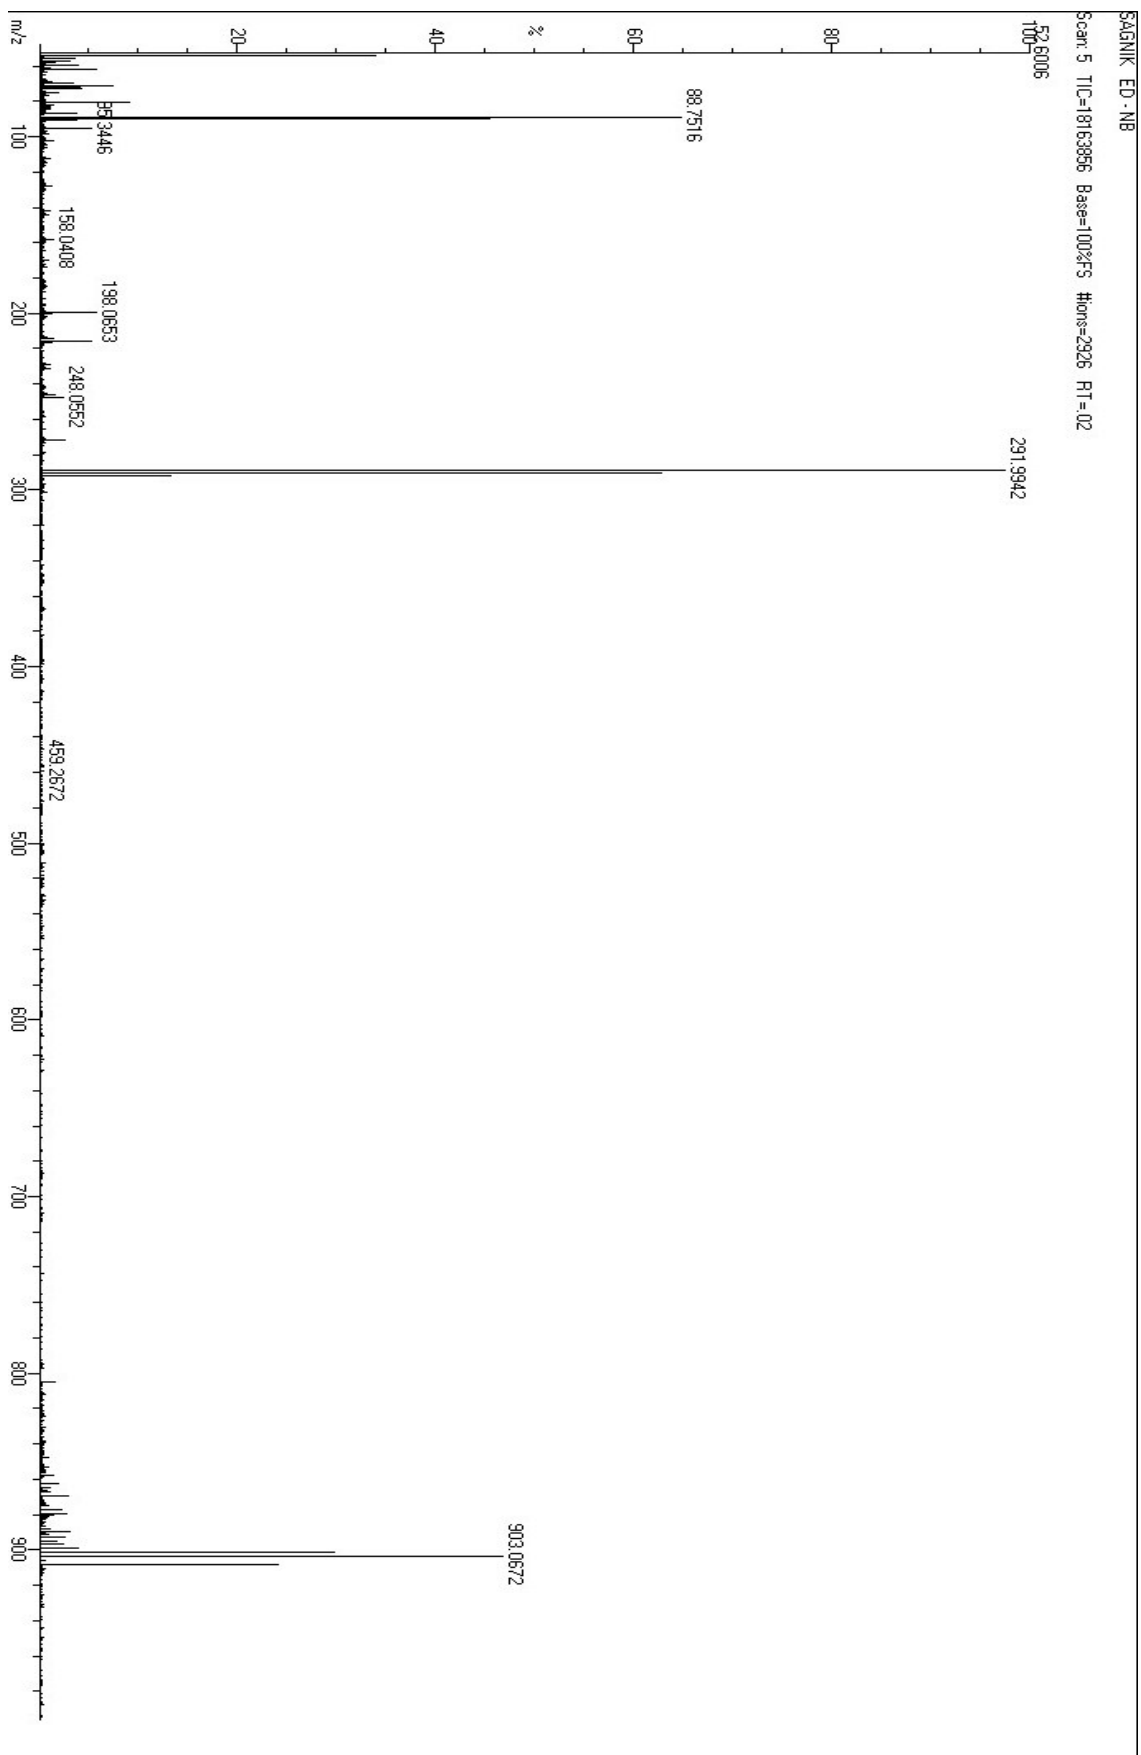

**Fig. S12.** ESI mass spectrum of Compound 4

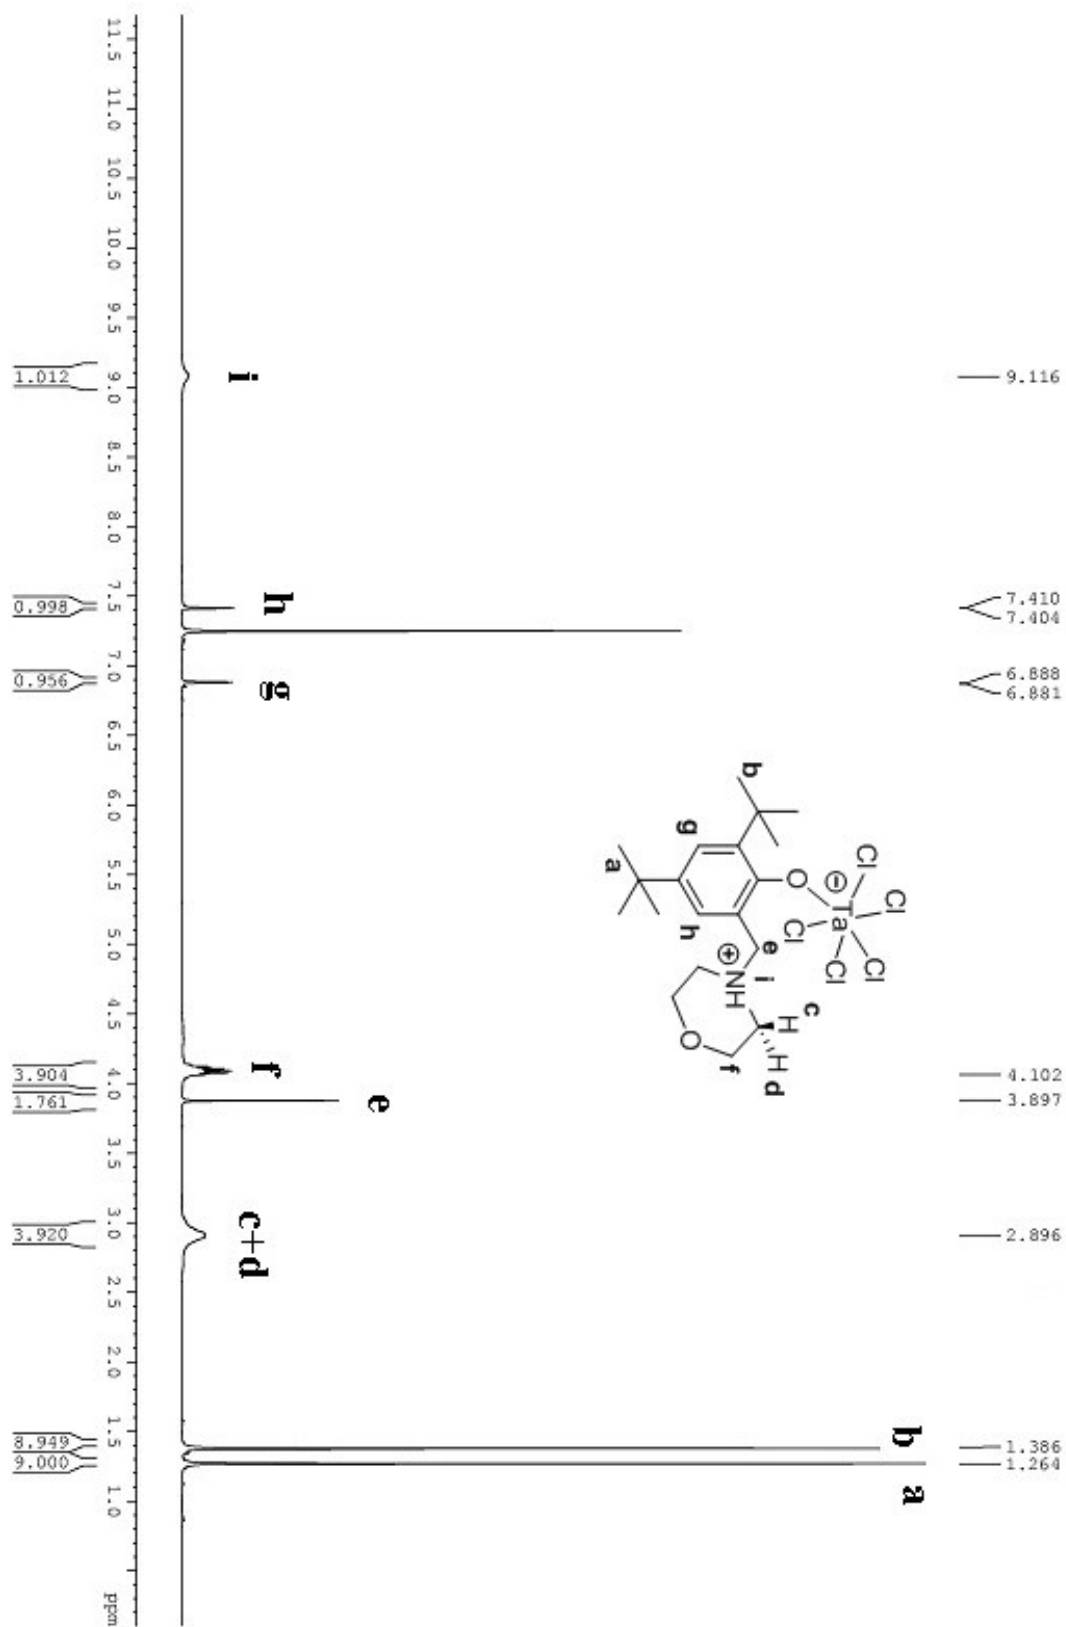

Fig. S13.  $^1\text{H}$  NMR (400 MHz,  $\text{CDCl}_3$ ) of Compound 5

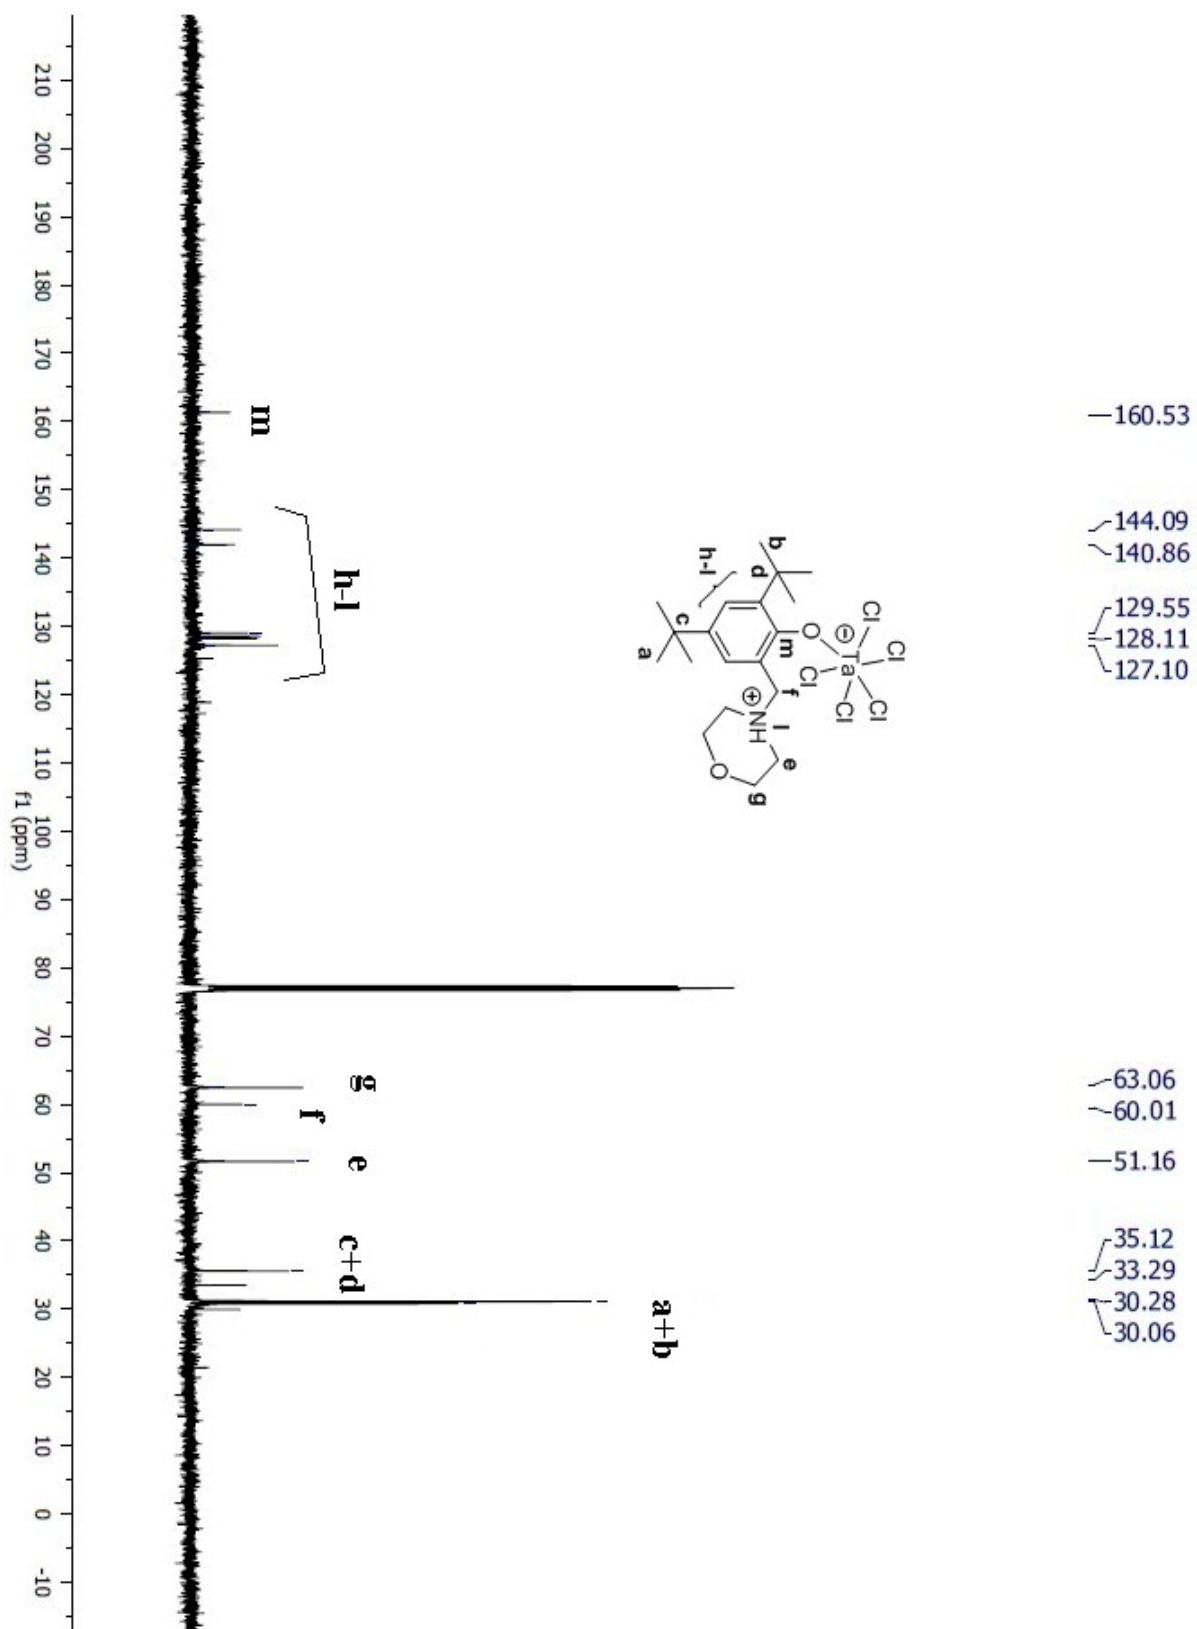

Fig. S14.  $^{13}\text{C}$  NMR (100 MHz,  $\text{CDCl}_3$ ) of Compound 5

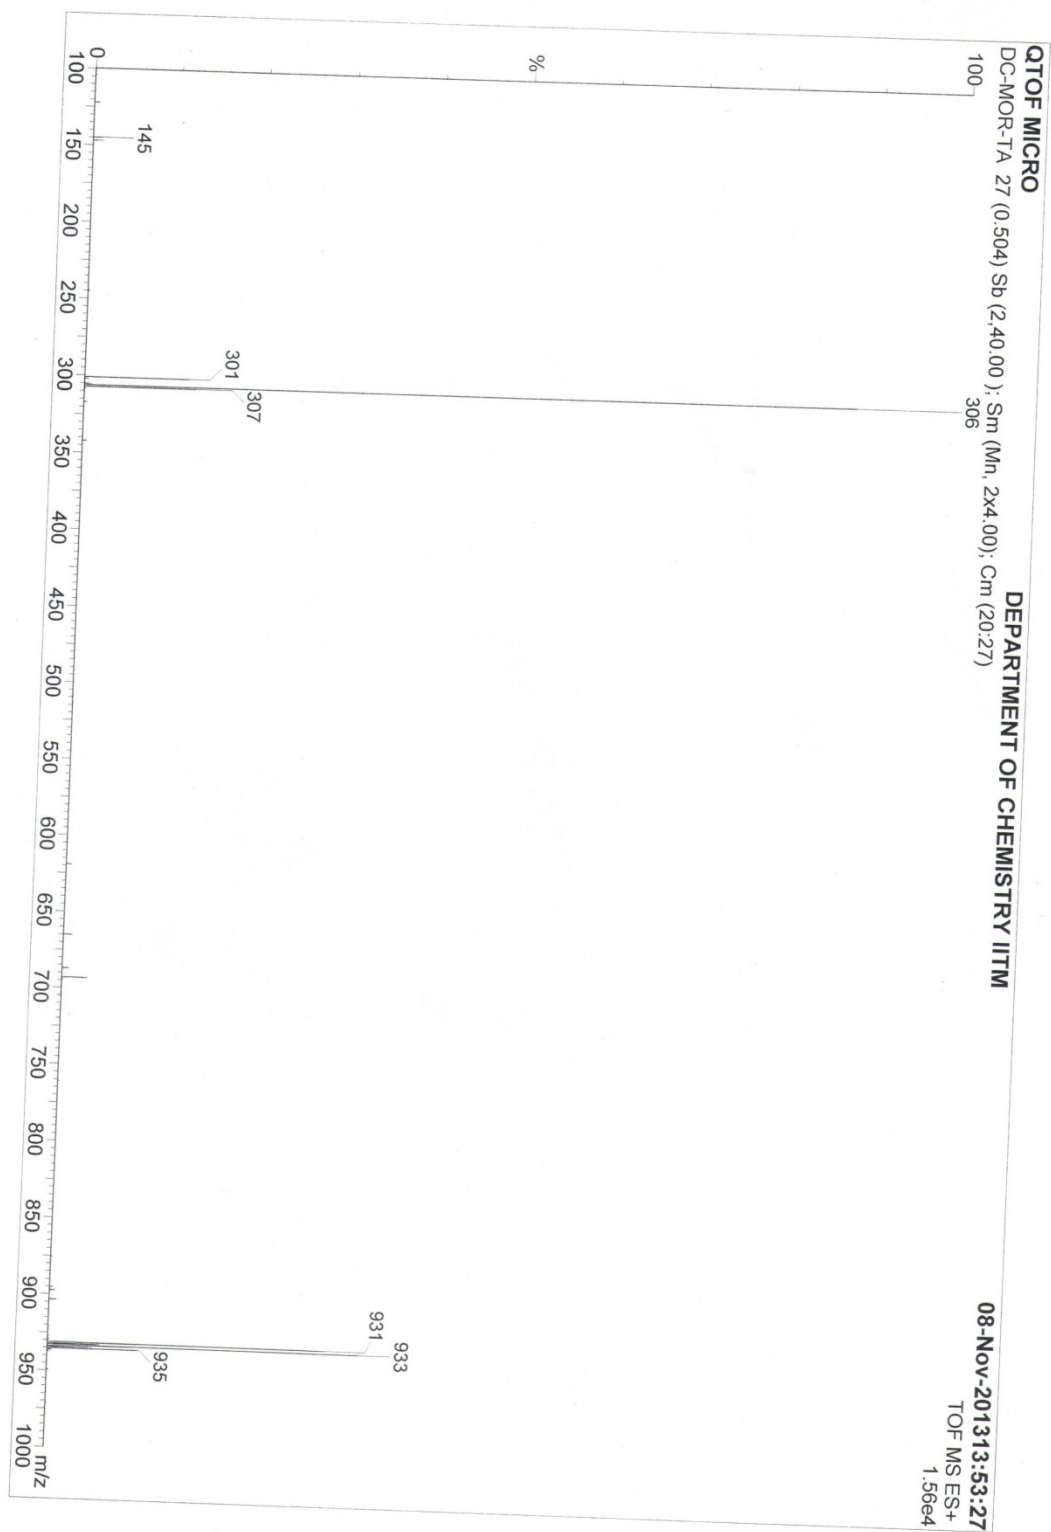

**Fig. S15.** ESI mass spectrum of Compound 5



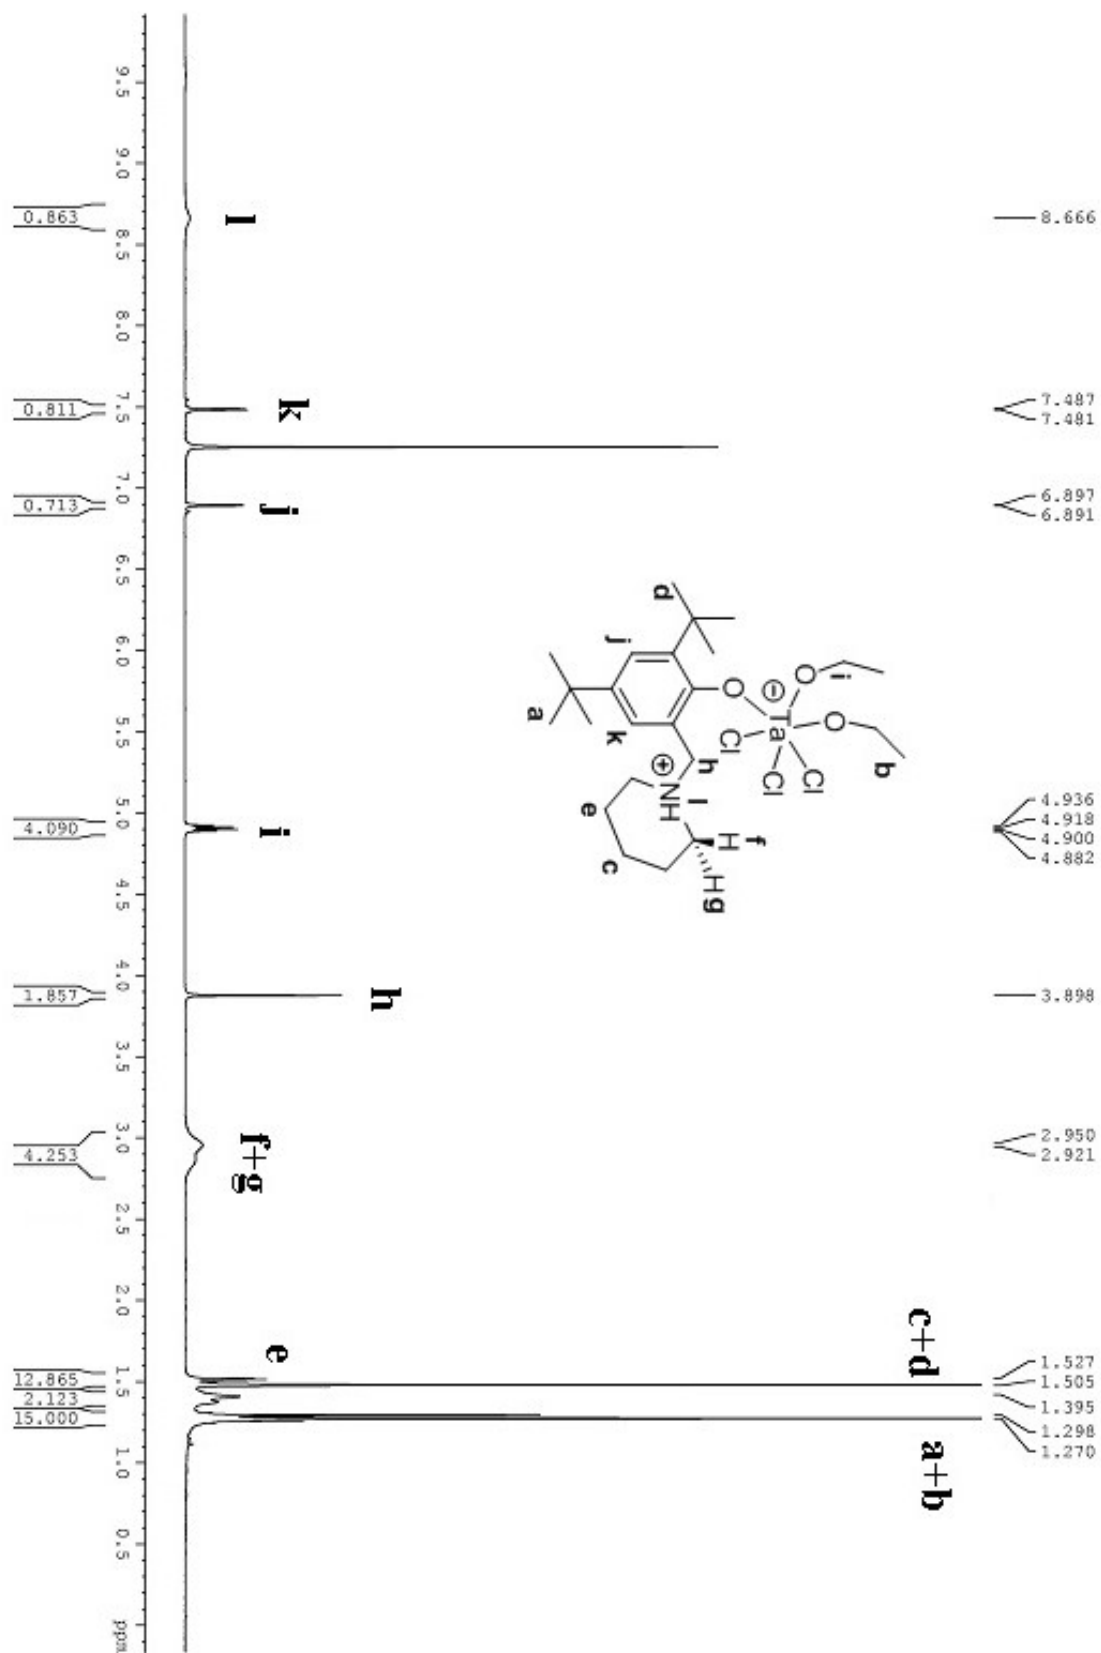

Fig. S16.  $^1\text{H}$  NMR (400 MHz,  $\text{CDCl}_3$ ) of Compound 6a

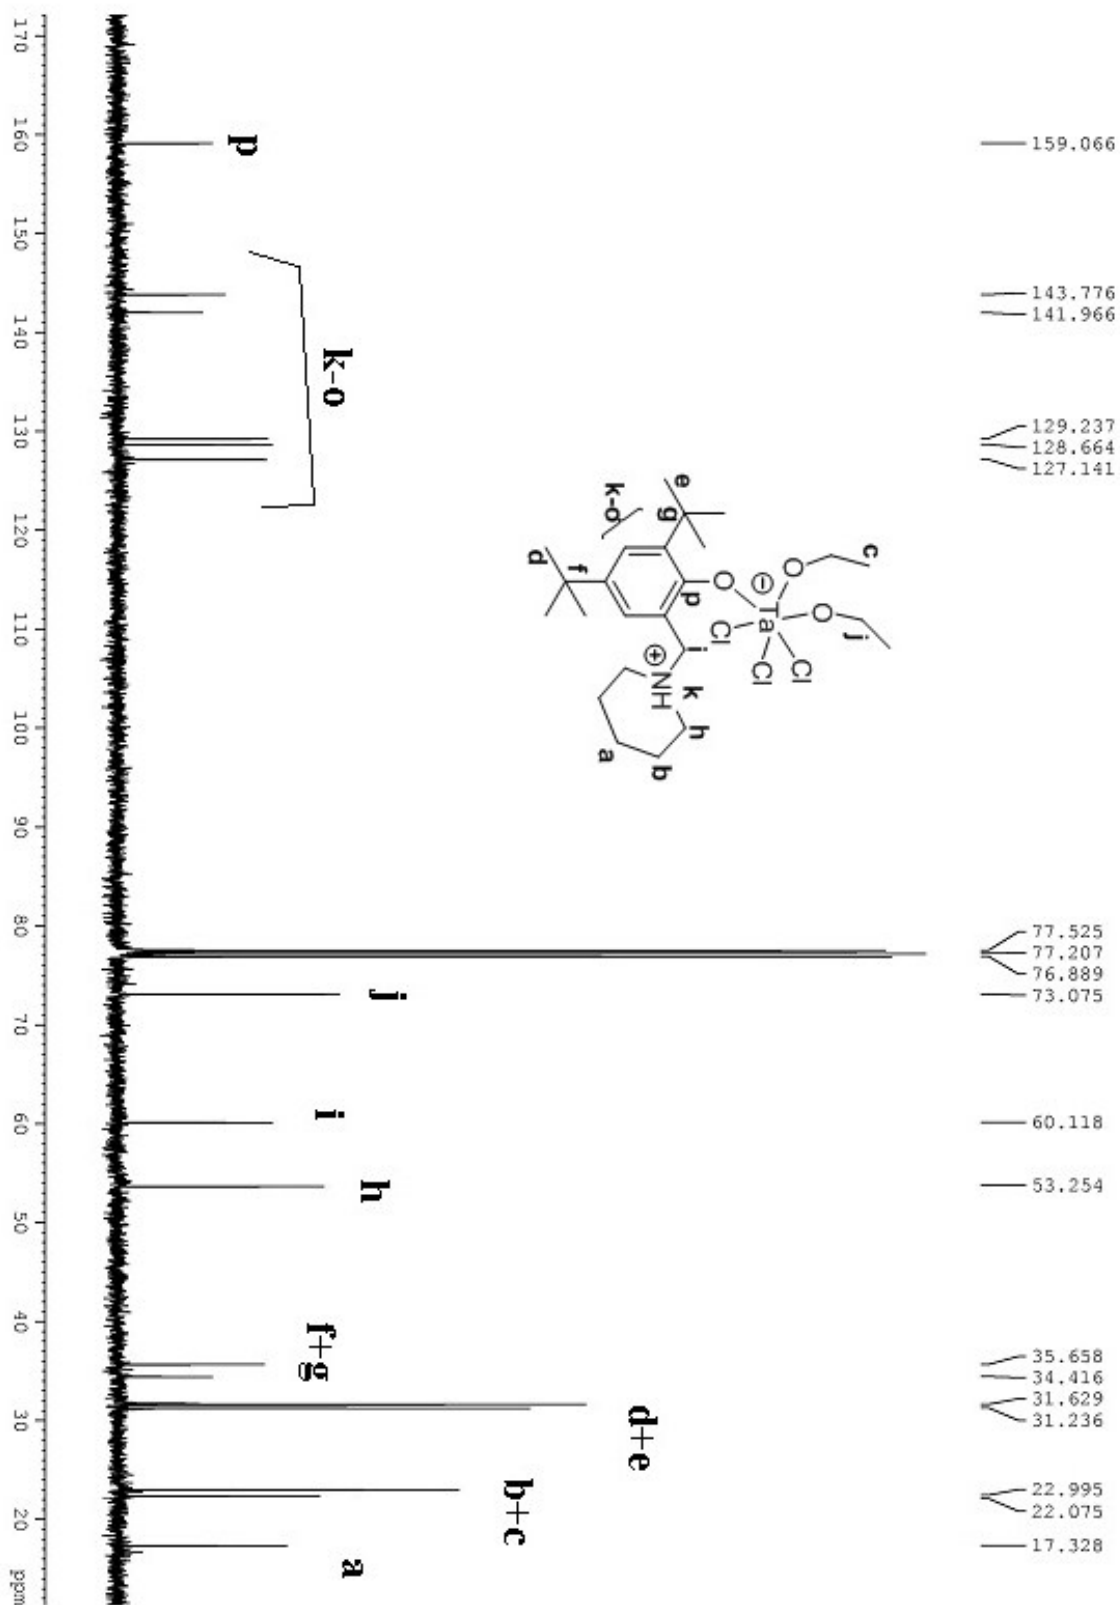

Fig. S17.  $^{13}\text{C}$  NMR (100 MHz,  $\text{CDCl}_3$ ) of Compound 6a

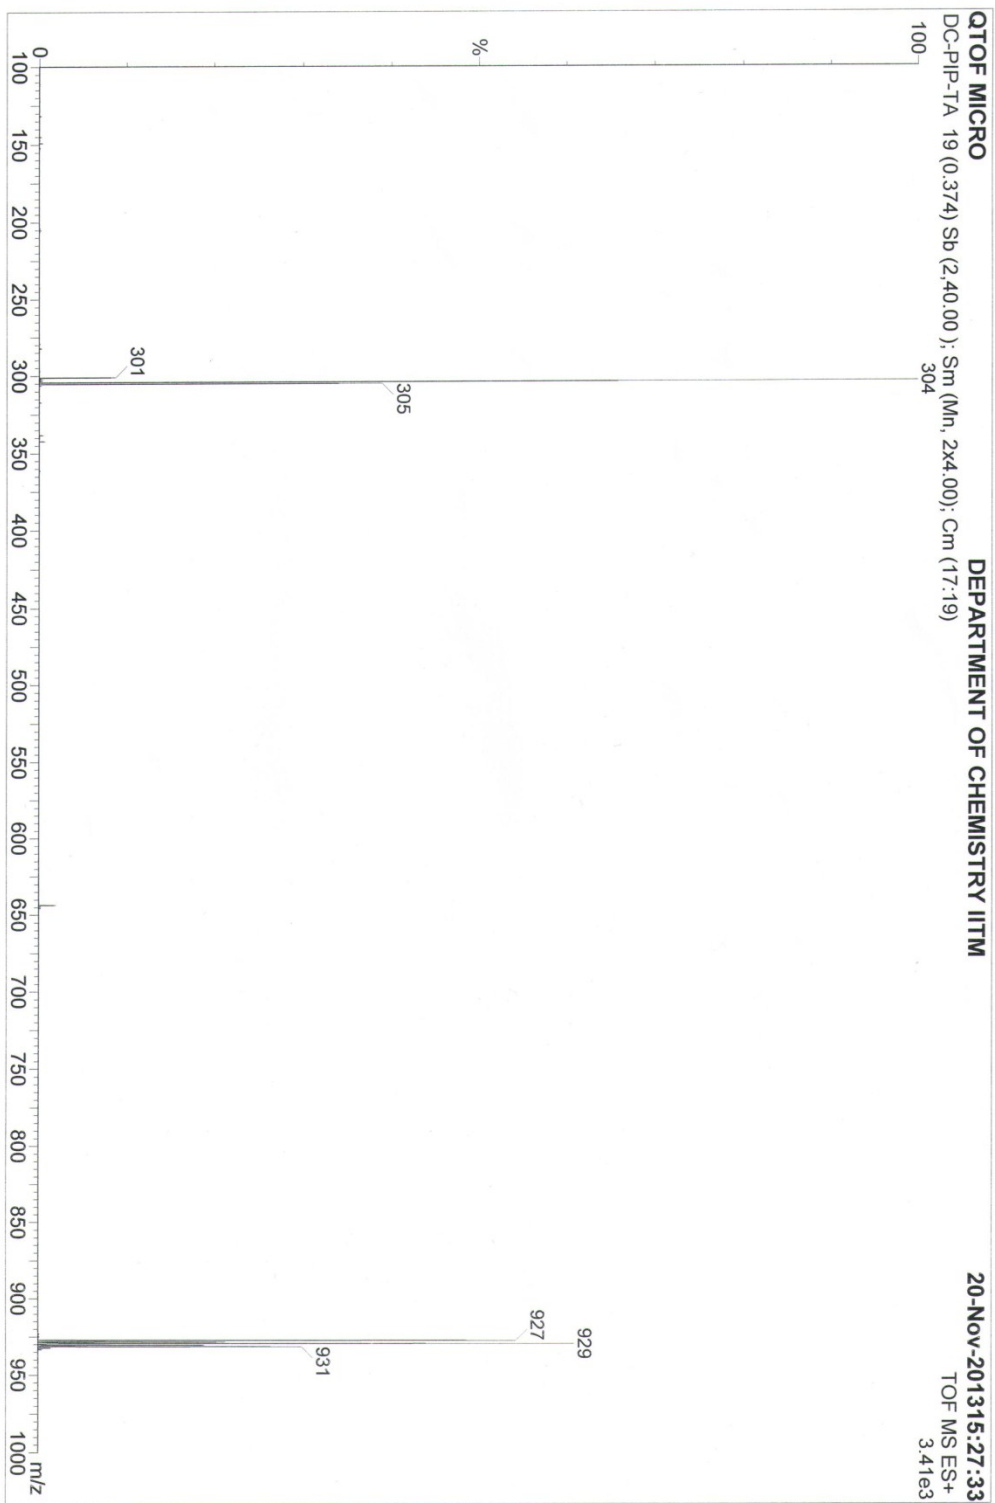

**Fig. S18.** ESI mass spectrum of Compound 6

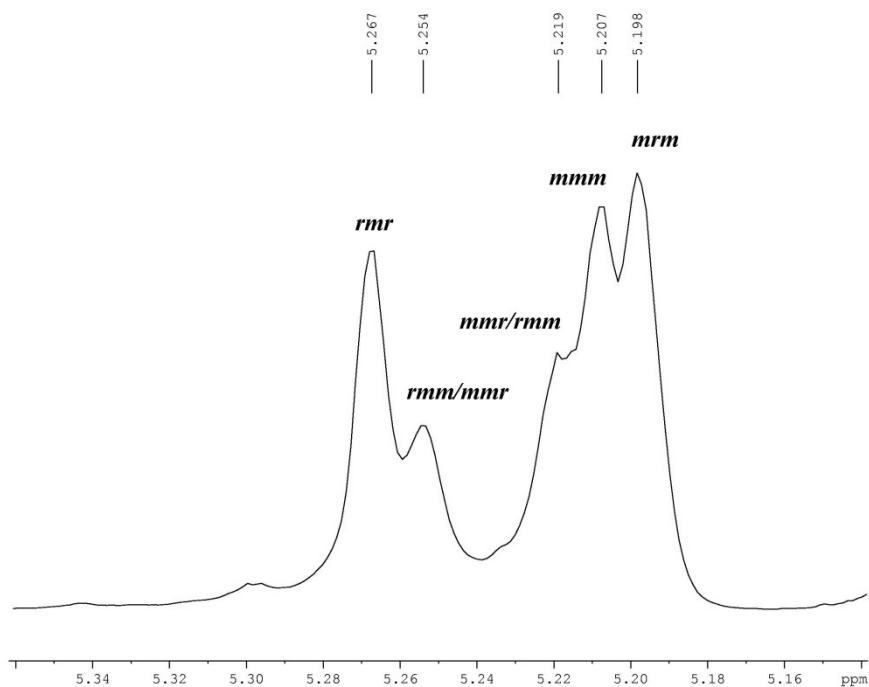

**Fig. S19.** Homonuclear decoupled  $^1\text{H}$  NMR (500 MHz,  $\text{CDCl}_3$ ) spectrum of the methine region of PLA obtained using **1**

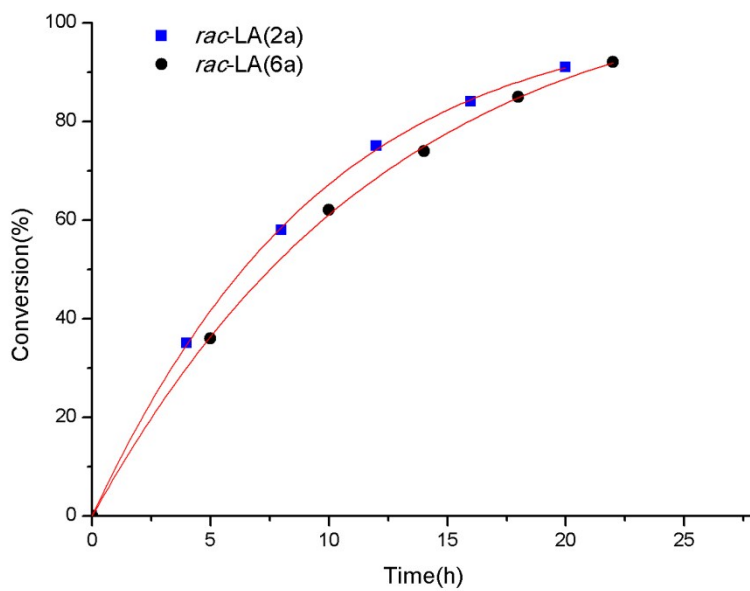

**Fig. S20.** *rac*-LA conversion vs time plot using **2a** and **6a**:  $[\text{M}]_0/[\text{Cat}]_0 = 200$  at  $140\text{ }^\circ\text{C}$

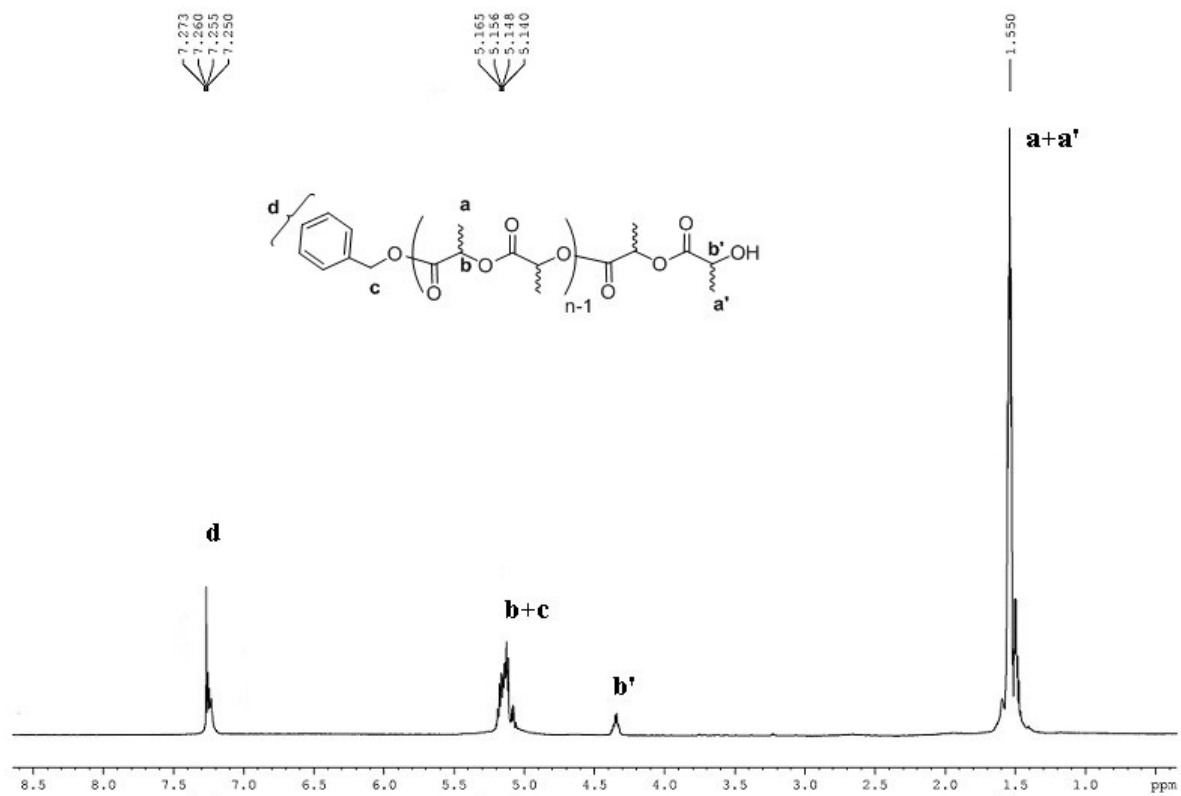

**Fig. S21.** <sup>1</sup>H NMR spectrum (400 MHz, CDCl<sub>3</sub>) of the crude product obtained from a reaction between *rac*-LA and **2a** and BnOH in 20:1:5 ratio at 140 °C.

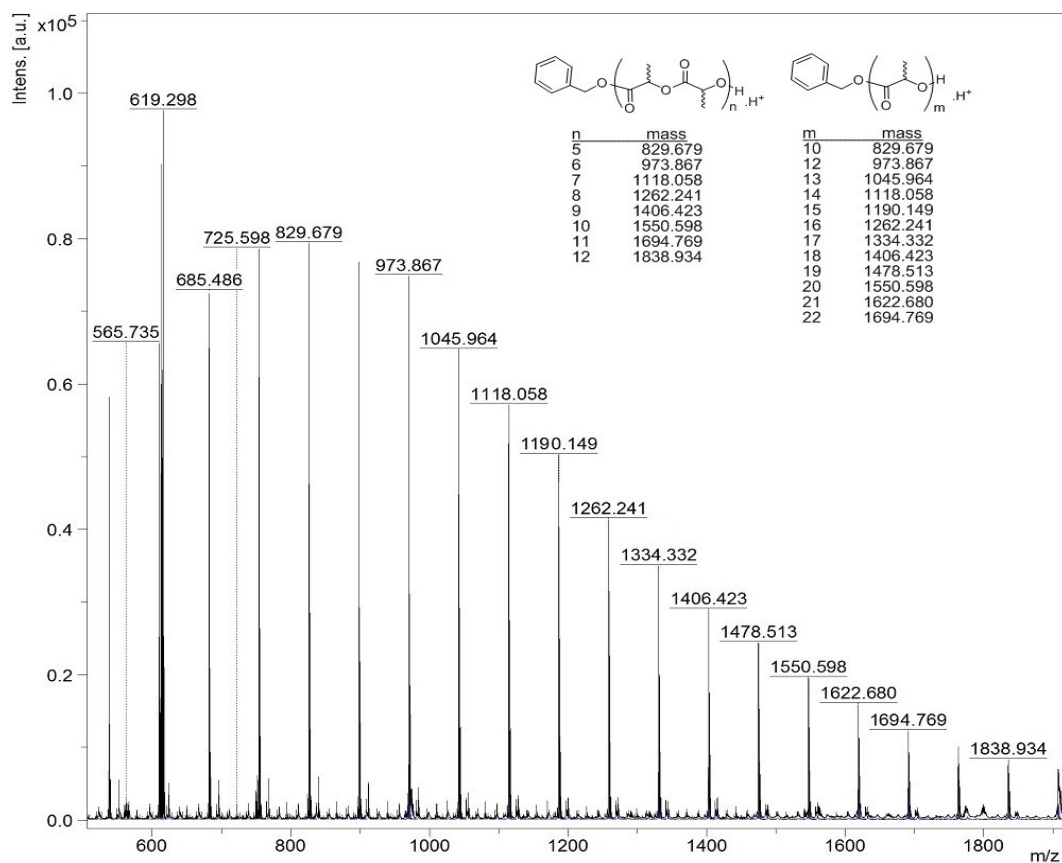

**Fig. S22.** MALDI-TOF mass spectrum of the crude product obtained from a reaction between *rac*-LA and **2a** and BnOH in 20:1:5 ratio at 140 °C.

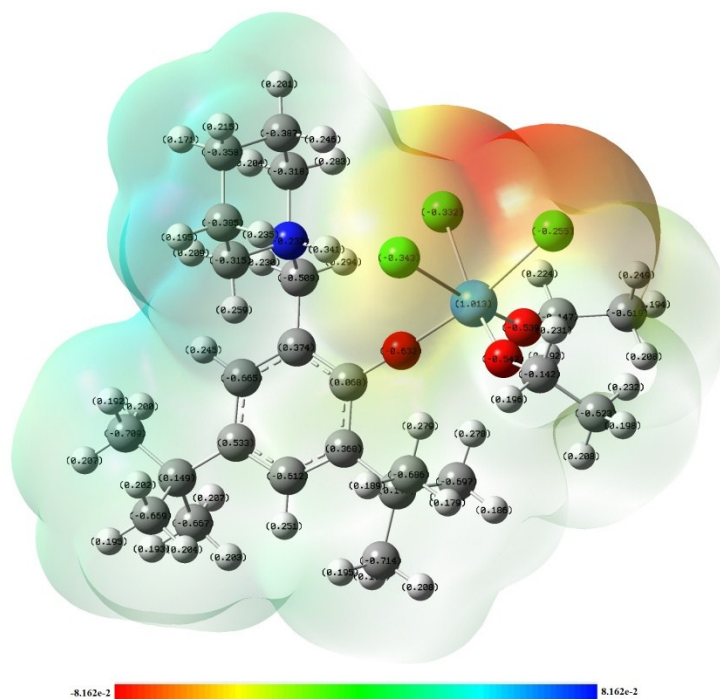

**Fig. S23.** The MEP mapped surface of **6a** calculated at an isovalue of 0.004 representing electrostatic potential.
